# Supplementary material
Source: ML conference proceedings conference paper supplement (https://openreview.net/forum?id=RxkCwOKVKa)
Supplement: supplementary_material [file appendix.pdf › supplementary/appendix.pdf]

## 883 Appendix

### 884 A Additional results

885 Section 4.2 presents the contour plots of Sable with all inference strategies on the hardest 8 tasks of  
 886 the benchmark. We report the contour plots of the other 9 remaining tasks on Fig. 8.

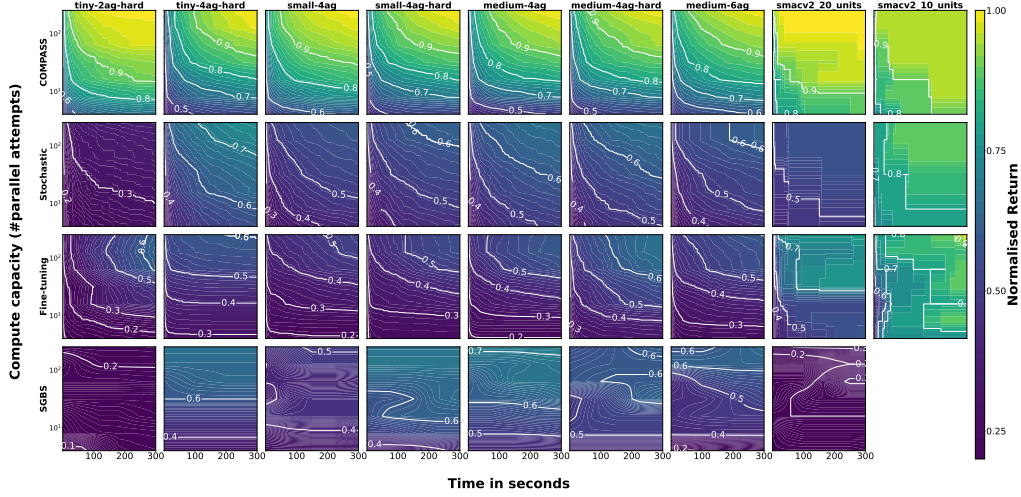

Figure 8: **Performance contour plots of Sable with different inference strategies on remaining 9 tasks** on a range of time budget ( $x$ -axis) and compute capacities ( $y$ -axis). Colours indicates performance, with brighter colours indicating higher values.

887 Fig. 8, shows similar trends to those illustrated in Section 4.2. SABLE +COMPASS leads to the best  
 888 overall performance. Stochastic sampling provides a good and robust baseline overall. Finally, SGBS  
 889 and online fine-tuning suffer from variance: despite being able to compete close to COMPASS on  
 890 a couple tasks, they often get outperformed by stochastic sampling. We are not able to report the  
 891 results for SABLE +SGBS on smacv2\_10\_units because we found an issue and could not complete  
 892 new runs in time. The figure will be updated with the new results for the rebuttal.

### 893 B Details about the tasks

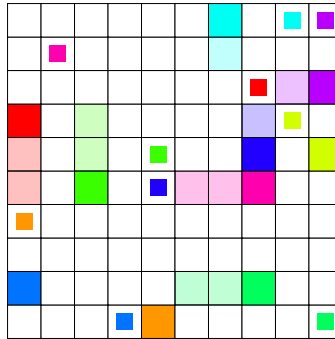

Figure 9: Environment rendering for Connector. Task name: con-10x10-10a. Image from [Mahjoub et al. \(2025\)](#).

894 **Connector** is an environment designed to model the routing of a printed circuit board (PCB). Agents  
 895 start at randomly generated initial positions and have to reach a goal position without overlapping

with each other’s paths (indicated as lower opacity coloured cells in Figure 9). Each agent has a partial view with a fixed field of view around itself as well as its current  $(x, y)$ -coordinate on the grid and the  $(x, y)$ -coordinate of its goal location. At each timestep, agents receive a small negative reward  $-0.03$  and receive a reward of 1 for successfully connecting to a goal location. The particular difficulty in this environment stems from the fact that agents have to select actions carefully so that they not only reach their goal greedily but so that all agents can ultimately reach their goals.

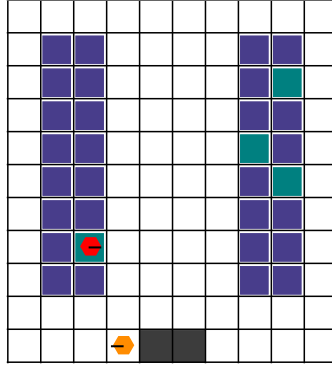

Figure 10: Environment rendering for Robot Warehouse. Task name: `tiny-2ag`. Image from [Mahjoub et al. \(2025\)](#).

**RWARE** is an environment where agents need to coordinate to deliver shelves (green cells in Figure 10) to a goal location (dark grey cells in Figure 10) in a warehouse. The reward is sparse since agents only receiving a reward of 1 for a successful shelf delivery to the goal location and 0 otherwise. This sparsity makes the environment particularly difficult since agents have to complete a long sequence of correct actions in order to receive any reward signal.

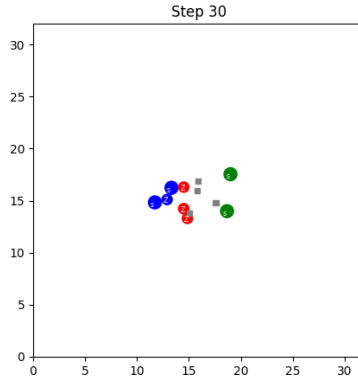

Figure 11: Environment rendering for SMAX. Task name: `2s3z`. Image from [Mahjoub et al. \(2025\)](#).

**SMAC** is an environment where agents need to coordinate and develop the correct micro strategies in order to defeat an enemy team. It was shown that the original benchmark was overly simplistic and for this reason SMACv2 ([Ellis et al., 2023](#)) was developed in order to address the shortcomings of the original benchmark. SMACv2 randomly generates a team of allied units by sampling from a selection of unit types and randomly generates ally starting positions at the start of each episode. The need for generalisation is what gives this benchmark its difficulty.

**JAX-based implementations.** Since Connector was developed as part of Jumanji ([Bonnet et al., 2023](#)), we make use of the JAX-based implementation directly. For RWARE we use the JAX-based reimplementation from Jumanji and for SMAC and SMACv2 we make use of the JAX-based reimplementation from JaxMARL ([Rutherford et al., 2023](#)), named SMAX. For a detailed discussion on task naming conventions we refer the reader to the Appendix of [Mahjoub et al. \(2025\)](#).

## 918 C Hyper-parameters

919 In this section, we report the hyper-parameters used in our experiments. They can also be found in  
 920 the submitted code files.

921 **Training - base policies** Hyper-parameters used to train the base policies for this benchmark are  
 922 taken from Mahjoub et al. (2025). These hyper-parameters were tuned on each task with a budget of  
 923 40 trials using the Tree-structured Parzen Estimator (TPE) Bayesian optimisation algorithm, and are  
 924 reported in Mahjoub et al. (2025).

925 **Hyper-parameters - COMPASS Training** Hyper-parameters used to train all the COMPASS  
 926 checkpoints can be found in Table 1. Most of them were kept close to the original hyper-parameters  
 927 used in Chalumeau et al. (2023b).

Table 1: Hyper-parameters used for COMPASS’ training phase. The same values are used for all three base policies (i.e., SABLE, IPPO, MAPPO).

| Parameter                   | Value |
|-----------------------------|-------|
| Instances batch size        | 128   |
| Latent space sample size    | 64    |
| Latent space dimension size | 16    |
| Latent amplifier            | 1     |
| Padding with random weights | True  |
| Weight noise amplitude      | 0.01  |

928 **Hyper-parameters - Inference-time search** Most values are directly taken from original works  
 929 or kept close to these. When different, we tried to use guidance from original work to decide how  
 930 to set them. The values for the CMA-ES search used with COMPASS, for all base policies, can  
 931 be found in Table 2. The values for online fine-tuning (all base policies) are reported in Table 3.  
 932 Hyper-parameters for SGBS (all base policies) are reported in Table 4, and for stochastic sampling  
 933 in Table 5.

Table 2: Hyper-parameters of the CMA-ES process used to search COMPASS’ latent space at inference time. The same parameters are used for all tasks and all base policies (i.e., SABLE, MAPPO and IPPO).

| Parameter                   | Number of attempts |     |     |     |     |     |     |
|-----------------------------|--------------------|-----|-----|-----|-----|-----|-----|
|                             | 4                  | 8   | 16  | 32  | 64  | 128 | 256 |
| Latent sample size          | 4                  | 8   | 16  | 32  | 64  | 128 | 256 |
| Number of elites            | 2                  | 4   | 8   | 16  | 32  | 64  | 128 |
| Covariance matrix step size | 1.0                | 1.0 | 1.0 | 1.0 | 1.0 | 1.0 | 1.0 |
| Initial sigma               | 1.0                | 1.0 | 1.0 | 1.0 | 1.0 | 1.0 | 1.0 |
| Num. components             | 1                  | 1   | 1   | 1   | 1   | 1   | 1   |

Table 3: Hyper-parameters used when doing online fine-tuning at inference-time with SABLE, MAPPO and IPPO.

| Parameter            | Task Name       | Sable   | IPPO    | MAPPO   |
|----------------------|-----------------|---------|---------|---------|
| Max. trajectory size | All tasks       | 64      | 64      | 64      |
| Learning rate        | con-10x10x10a   | 0.001   | 0.00025 | 0.0001  |
|                      | con-15x15x23a   | 0.001   | 0.0001  | 0.0001  |
|                      | large-4ag       | 0.001   | 0.0005  | 0.0001  |
|                      | large-4ag-hard  | 0.001   | 0.0005  | 0.00025 |
|                      | large-8ag       | 0.001   | 0.00025 | 0.0001  |
|                      | large-8ag-hard  | 0.001   | 0.00025 | 0.0005  |
|                      | medium-4ag      | 0.001   | 0.00025 | 0.00025 |
|                      | medium-4ag-hard | 0.0005  | 0.0005  | 0.00025 |
|                      | medium-6ag      | 0.0005  | 0.0001  | 0.00025 |
|                      | smacv2_10_units | 0.00025 | 0.0005  | 0.00025 |
|                      | smacv2_20_units | 0.001   | 0.0005  | 0.0005  |
|                      | smacv2_5_units  | 0.001   | 0.00025 | 0.00025 |
|                      | small-4ag       | 0.0005  | 0.0005  | 0.0005  |
|                      | small-4ag-hard  | 0.001   | 0.0001  | 0.00025 |
|                      | tiny-2ag-hard   | 0.001   | 0.00025 | 0.00025 |
|                      | tiny-4ag-hard   | 0.0005  | 0.0005  | 0.0005  |
|                      | xlarge-4ag      | 0.001   | 0.0005  | 0.0005  |
|                      | xlarge-4ag-hard | 0.0001  | 0.0005  | 0.0001  |
| Entropy coefficient  | Connector       | 0.05    | 0.00    | 0.00    |
|                      | RWARE           | 0.0     | 0.0     | 0.0     |
|                      | SMAX            | 0.0     | 0.0     | 0.0     |

Table 4: Hyper-parameters for Simulation Guided Beam Search (SGBS). The same values are used for SABLE, IPPO and MAPPO. Values are chosen such that beam width and top-k use fully the number of attempts allowed by batch.

| Parameter  | Number of attempts |    |    |    |     |     |
|------------|--------------------|----|----|----|-----|-----|
|            | 4                  | 16 | 32 | 64 | 128 | 256 |
| Beam width | 4                  | 4  | 4  | 4  | 4   | 4   |
| Top k      | 1                  | 4  | 8  | 16 | 32  | 64  |

Table 5: To sample stochastically from a policy (SABLE, IPPO or MAPPO), we always use the same temperature as the one used during training: 1.0.

| Parameter         | Value |
|-------------------|-------|
| Evaluation greedy | False |
| Temperature       | 1.0   |

## 934 D Experimental stack

935 All algorithmic implementations are built by extending the JAX-based research library, Mava (de Kock  
936 et al., 2021). Our version of CMA-ES used for searching COMPASS’s latent space comes from the  
937 JAX-based quality diversity library, QDAX (Chalumeau et al., 2024a). Both these libraries are built to  
938 leverage the DeepMind JAX ecosystem (DeepMind et al., 2020) and use Flax (Heek et al., 2024) for  
939 building neural networks, optax for optimisers and orbax for model checkpointing.



## E Additional details about training

### E.1 Base policy training

In Section 3, we explain that in our setting, it is assumed that all methods can be trained until convergence. For transparency and comparison with previous results in the literature, we report in Table 6 the training budget given to the methods to reach convergence, in environment steps.

Table 6: Training budgets (in environment steps) for each method across tasks.

| Task Name       | Sable | MAPPO | IPPO |
|-----------------|-------|-------|------|
| con-10x10x10a   | 100M  | 200M  | 200M |
| con-15x15x23a   | 100M  | 200M  | 200M |
| large-4ag       | 600M  | 200M  | 200M |
| large-4ag-hard  | 600M  | 400M  | 200M |
| large-8ag       | 600M  | 400M  | 200M |
| large-8ag-hard  | 600M  | 200M  | 200M |
| medium-4ag      | 400M  | 200M  | 200M |
| medium-4ag-hard | 600M  | 200M  | 200M |
| medium-6ag      | 600M  | 200M  | 200M |
| small-4ag       | 200M  | 200M  | 200M |
| small-4ag-hard  | 400M  | 200M  | 200M |
| tiny-2ag-hard   | 100M  | 200M  | 200M |
| tiny-4ag-hard   | 200M  | 200M  | 200M |
| xlarge-4ag      | 200M  | 400M  | 200M |
| xlarge-4ag-hard | 200M  | 200M  | 200M |
| smacv2_10_units | 100M  | 200M  | 200M |
| smacv2_20_units | 600M  | 200M  | 200M |

### E.2 COMPASS training

In this section, we provide details about COMPASS and our implementation. For a more in-depth explanation, we refer the reader to the original paper (Chalumeau et al., 2023b). Our implementation is available in the submitted code files.

COMPASS is a method, which (i) uses a pre-trained base policy and modifies it to be conditioned by a latent vector (ii) re-trains it to enable latent vectors to create policies that are diversified and specialised for distinct training sub-distributions. At inference-time, this enables to search for the latent vector which performs best on the new instance to be solved.

**Reincarnating a pre-trained base policy** COMPASS checkpoints are not trained from scratch, they reincarnate an existing base policy, add parameters to this policy in order to process the latent vector which can be given as additional input. Hence, one must choose where to inject the latent vector in the existing architecture, and must modify the existing parameters of the neural policy to account for the new shape of the input. The latent vector must be input in a way that enables to diversify the actions produced for the same observation (i.e., making sure that different latent vectors create different policies). In practice, we concatenate the latent vector to the observations. When relevant, we make sure that this is done after observation normalisation layers.

In the original work, the additional weights added to the base neural network are initialised with zeros. In our case, we observed that this could not provide enough diversification in the first training step, preventing any emergence of specialisation, leading to no benefit. We found that initialising these parameters with random uniform values between  $-0.01$  and  $0.01$  fixed the issue across all tasks.

**Creating diversity and specialisation in the latent space** Similarly to the original method, the latent space is not learned, it is a fixed prior, and the network’s weights are learned to create diversity from this prior space. We also use a similar prior, which is a uniform distribution between  $-1$  and  $1$ , over 16 dimensions. We do not need any amplification of the latent vector (i.e., we multiply by 1, whereas the original work multiplies it by 100). At each training step, a batch of instances is

sampled from the training distribution, a batch of latent vectors is sampled from that latent space, the conditioned policy is evaluated for each instance, for each latent vector, and only the best performing latent vectors, for each instance, are used in the computation of the loss. This creates the specialisation (diversification). For additional motivation and mathematical formulation, we refer the reader to Chalumeau et al. (2023b). Like all training processes in our experimental study, the method is allowed to train until convergence. In practice, each COMPASS checkpoint was trained for 100 million steps.

## F Pseudo-algorithms

In this section, we provide algorithmic descriptions for the inference strategies used in the paper, showing how the policy is used at inference time, under the time and budget constraints. Stochastic sampling is explained in Algorithm 1, SGBS in Algorithm 2, online fine-tuning in Algorithm 3 and COMPASS in Algorithm 4.

Algorithms use the terminology *trajectory*  $\tau$ , which is equivalent to *solution*. The symbol  $\circ$  is used for the concatenation of a new step transition to a partial trajectory.

---

### Algorithm 1 Stochastic Sampling

---

```

1: Input: policy  $\pi_\theta$ , instance  $\rho$ , time budget  $T_{\max}$ , compute capacity  $B_{\max}$ , reward function  $\mathcal{R}$ 
2: Initialize best trajectory  $\tau^* \leftarrow \emptyset$ , best score  $R^* \leftarrow -\infty$ 
3: while elapsed time  $< T_{\max}$  do
4:   for parallel rollout  $b = 1$  to  $B_{\max}$  do
5:     Initialize trajectory  $\tau_b \leftarrow \emptyset$ 
6:     for step  $t = 1$  to  $H$  do
7:       Observe  $\mathbf{o}_t$  from environment copy  $\rho_b$ 
8:       Sample  $\mathbf{a}_t \sim \pi_\theta(\cdot \mid \mathbf{o}_t)$ 
9:       Execute  $\mathbf{a}_t$  in  $\rho_b$ , observe  $\mathbf{o}_{t+1}$ 
10:      Append  $(\mathbf{o}_t, \mathbf{a}_t)$  to  $\tau_b$ 
11:       $R_b \leftarrow \mathcal{R}(\tau_b)$ 
12:      if  $R_b > R^*$  then
13:         $\tau^* \leftarrow \tau_b$ ,  $R^* \leftarrow R_b$ 
14: return  $\tau^*$ 

```

---



---

### Algorithm 2 Simulation-Guided Beam Search

---

```

1: Input: policy  $\pi_\theta$ , instance  $\rho$ , time budget  $T_{\max}$ , compute capacity  $B_{\max}$ , beam width  $K$ , reward function  $\mathcal{R}$ 
2: Initialize beam  $\mathcal{B} \leftarrow \{\emptyset\}$ , best trajectory  $\tau^* \leftarrow \emptyset$ , best score  $R^* \leftarrow -\infty$ 
3: while elapsed time  $< T_{\max}$  do
4:    $\mathcal{B}_{\text{new}} \leftarrow \emptyset$ 
5:   for partial trajectory  $\tau$  in  $\mathcal{B}$  do
6:     for sample  $b = 1$  to  $B_{\max}/|\mathcal{B}|$  do
7:       Let  $\mathbf{o}_t$  be the observation at the end of  $\tau$ 
8:       Sample  $\mathbf{a}_t \sim \pi_\theta(\cdot \mid \mathbf{o}_t)$ 
9:       Simulate greedy rollout from  $\tau \circ \mathbf{a}_t$  using  $\pi_\theta$ 
10:      Let  $\hat{\tau}_b$  be the resulting full trajectory
11:       $R_b \leftarrow \mathcal{R}(\hat{\tau}_b)$ 
12:      Add  $(\tau \circ \mathbf{a}_t, R_b)$  to  $\mathcal{B}_{\text{new}}$ 
13:      if  $R_b > R^*$  then
14:         $\tau^* \leftarrow \hat{\tau}_b$ ,  $R^* \leftarrow R_b$ 
15:   Prune top- $K$  trajectories from  $\mathcal{B}_{\text{new}}$  into  $\mathcal{B}$ 
16: return  $\tau^*$ 

```

---

---

**Algorithm 3** Online Fine-Tuning

---

```
1: Input: base policy  $\pi_\theta$ , instance  $\rho$ , time budget  $T_{\max}$ , compute capacity  $B_{\max}$ , reward function  $\mathcal{R}$ , learning rate  $\alpha$ 
2: Initialize best trajectory  $\tau^* \leftarrow \emptyset$ , best score  $R^* \leftarrow -\infty$ 
3: Initialize adapted parameters  $\theta' \leftarrow \theta$ 
4: while elapsed time  $< T_{\max}$  do
5:   for parallel rollout  $b = 1$  to  $B_{\max}$  do
6:     Rollout  $\tau_b \sim \pi_{\theta'}$  on  $\rho$ 
7:      $R_b \leftarrow \mathcal{R}(\tau_b)$ 
8:     if  $R_b > R^*$  then
9:        $\tau^* \leftarrow \tau_b$ ,  $R^* \leftarrow R_b$ 
10:    Compute gradient:  $\nabla_\theta \leftarrow \frac{1}{B_{\max}} \sum_{b=1}^{B_{\max}} \nabla_\theta \log \pi_{\theta'}(\tau_b) \cdot R_b$ 
11:    Update parameters:  $\theta' \leftarrow \theta' + \alpha \nabla_\theta$ 
12: return  $\tau^*$ 
```

---

---

**Algorithm 4** COMPASS + CMA-ES search

---

```
1: Input: latent-conditioned policy  $\pi_\theta(\cdot \mid \mathbf{o}, z)$ , instance  $\rho$ , time budget  $T_{\max}$ , compute capacity  $B_{\max}$ , reward function  $\mathcal{R}$ 
2: Initialize CMA-ES: mean  $\mu$ , covariance  $\Sigma$ 
3: Initialize best trajectory  $\tau^* \leftarrow \emptyset$ , best score  $R^* \leftarrow -\infty$ 
4: while elapsed time  $< T_{\max}$  do
5:   Sample  $\{z_b\}_{b=1}^{B_{\max}} \sim \mathcal{N}(\mu, \Sigma)$ 
6:   for each  $z_b$  in parallel do
7:     Rollout  $\tau_b \sim \pi_\theta(\cdot \mid \mathbf{o}, z_b)$  on  $\rho$ 
8:      $R_b \leftarrow \mathcal{R}(\tau_b)$ 
9:     if  $R_b > R^*$  then
10:       $\tau^* \leftarrow \tau_b$ ,  $R^* \leftarrow R_b$ 
11:   Update  $(\mu, \Sigma)$  using CMA-ES with  $\{(z_b, R_b)\}_{b=1}^{B_{\max}}$ 
12: return  $\tau^*$ 
```

---

## G Discussion about the inference-time budget

**Choice of the budget used in the experiments** We create our experimental setting to be similar to practical use cases. Hence, we use time as the main budget constraint, instead of number of attempts (contrary to most literature on the topic). This enables to account for the cost of search and adaptation. Even though we always evaluate methods on 128 instances for each task, we ensure that each instance is solved fully independently, to avoid that the vectorisation process creates a bias towards one method or another. We choose to study methods with time budgets ranging from 30 to 300 seconds. The lower bound is taken to be small, to show that even short inference-time searches can provide significant benefit. The higher bound is chosen to be high enough to see which method can really benefit from a longer search budget. Concerning the compute capacity, we choose a range of values that seems achievable in practice. In real-world scenarios, simulations can get more complex and require one CPU core for one simulation. We hence believed that most use cases would fit within the limit of 256 simulations in parallel. Nevertheless, our code works for higher values and can be used to obtain results in new settings (both in terms of time and parallel attempts).

**Total number of attempts achieved within time budget** To remain consistent with previous literature, and provide a better understanding of the search and adaptation cost of each inference strategy and each base policy, we provide the number of attempts achieved within the time limit, for all tasks and compute capacity (i.e., number of parallel attempts allowed). Values for SABLE within 300 seconds are reported on Table 7 for COMPASS, Table 8 for online fine-tuning, Table 9 for stochastic sampling. SGBS builds new solutions from existing partial solutions, hence the count of the attempted solution cannot be obtained in the same way as other methods.

Values for all base policies within 30 seconds are reported on Table 10, Table 12 and Table 11.

Table 7: Number of attempts (solutions generated) when using SABLE + COMPASS during 300 seconds of inference-time search.

| Task Name       | Number of attempts |       |       |       |        |        |        |
|-----------------|--------------------|-------|-------|-------|--------|--------|--------|
|                 | 4                  | 8     | 16    | 32    | 64     | 128    | 256    |
| con-10x10x10a   | 9960               | 19448 | 37520 | 67296 | 131456 | 248320 | 422144 |
| con-15x15x23a   | 1608               | 3112  | 7744  | 14144 | 27456  | 53248  | 80896  |
| large-4ag       | 2608               | 5208  | 9360  | 16896 | 30464  | 44032  | 59392  |
| large-4ag-hard  | 2596               | 5000  | 9360  | 16832 | 29568  | 44288  | 59904  |
| large-8ag       | 1612               | 3200  | 6240  | 10304 | 17280  | 23424  | 30976  |
| large-8ag-hard  | 1708               | 3144  | 6096  | 10624 | 18880  | 29056  | 39680  |
| medium-4ag      | 2088               | 4072  | 7904  | 15104 | 29376  | 48256  | 87296  |
| medium-4ag-hard | 2072               | 4040  | 7888  | 16992 | 29632  | 48384  | 87552  |
| medium-6ag      | 1536               | 3016  | 5728  | 10816 | 21440  | 37760  | 74240  |
| smacv2_10_units | 7628               | 13248 | 26176 | 45088 | 74304  | 122624 | 174336 |
| smacv2_20_units | 5824               | 10428 | 18528 | 34112 | 64064  | 111232 | 180992 |
| small-4ag       | 1964               | 3880  | 8672  | 14112 | 28096  | 61568  | 83456  |
| small-4ag-hard  | 1876               | 4216  | 7104  | 15488 | 30464  | 52096  | 93696  |
| tiny-2ag-hard   | 2736               | 6072  | 11856 | 22496 | 44544  | 77440  | 147200 |
| tiny-4ag-hard   | 1384               | 2648  | 5024  | 10624 | 16640  | 32256  | 45568  |
| xlarge-4ag      | 1816               | 3568  | 7952  | 15264 | 24320  | 45440  | 81152  |
| xlarge-4ag-hard | 1180               | 2264  | 5344  | 9696  | 17792  | 28544  | 51200  |

Table 8: Number of attempts (solutions generated) when using online fine-tuning and SABLE during 300 seconds of inference-time search.

| Task Name       | Number of attempts |       |       |       |        |        |        |
|-----------------|--------------------|-------|-------|-------|--------|--------|--------|
|                 | 4                  | 8     | 16    | 32    | 64     | 128    | 256    |
| con-10x10x10a   | 10608              | 20256 | 37744 | 64448 | 115392 | 226560 | 395776 |
| con-15x15x23a   | 2136               | 3952  | 6864  | 10496 | 16592  | 32000  | 60928  |
| large-4ag       | 1792               | 3296  | 6560  | 9920  | 13376  | 24448  | 49664  |
| large-4ag-hard  | 2064               | 3416  | 6448  | 8832  | 13248  | 24448  | 46592  |
| large-8ag       | 1416               | 2336  | 4592  | 7552  | 11136  | 19200  | 34304  |
| large-8ag-hard  | 1140               | 2576  | 4064  | 6752  | 12736  | 26624  | 44032  |
| medium-4ag      | 2000               | 4176  | 7472  | 9920  | 15744  | 28160  | 48384  |
| medium-4ag-hard | 2024               | 3776  | 7232  | 10816 | 14848  | 28160  | 48384  |
| medium-6ag      | 1700               | 2872  | 6448  | 8704  | 21120  | 32896  | 65792  |
| smacv2_10_units | 6848               | 12576 | 20176 | 37536 | 68160  | 156672 | 235776 |
| smacv2_20_units | 5700               | 10584 | 18176 | 25216 | 47488  | 104382 | 155904 |
| small-4ag       | 1940               | 3688  | 7072  | 9600  | 14272  | 30336  | 49408  |
| small-4ag-hard  | 1940               | 3688  | 7072  | 9600  | 14272  | 30336  | 49408  |
| tiny-2ag-hard   | 2572               | 5600  | 9824  | 13344 | 22848  | 48768  | 86272  |
| tiny-4ag-hard   | 2572               | 5568  | 9808  | 13344 | 22784  | 48768  | 86272  |
| xlarge-4ag      | 1768               | 3856  | 6368  | 9792  | 13760  | 24448  | 46080  |
| xlarge-4ag-hard | 1280               | 2024  | 3776  | 6368  | 11456  | 21504  | 40192  |

Table 9: Number of attempts (solutions generated) when sampling stochastically from SABLE during 300 seconds of inference-time search.

| Task Name       | Number of attempts |       |       |       |        |        |        |
|-----------------|--------------------|-------|-------|-------|--------|--------|--------|
|                 | 4                  | 8     | 16    | 32    | 64     | 128    | 256    |
| con-10x10x10a   | 10632              | 20504 | 39524 | 70720 | 138624 | 264960 | 448512 |
| con-15x15x23a   | 2048               | 4056  | 7840  | 14144 | 27648  | 54144  | 101376 |
| large-4ag       | 2092               | 3624  | 7808  | 15456 | 30336  | 46464  | 82944  |
| large-4ag-hard  | 2108               | 3696  | 8112  | 13344 | 26816  | 46592  | 82176  |
| large-8ag       | 1508               | 2552  | 5824  | 9568  | 17984  | 30720  | 52480  |
| large-8ag-hard  | 1324               | 2256  | 4432  | 8416  | 16576  | 34048  | 32208  |
| medium-4ag      | 2388               | 4576  | 8064  | 15296 | 29760  | 53120  | 81664  |
| medium-4ag-hard | 2144               | 4616  | 7968  | 16992 | 29696  | 52992  | 88576  |
| medium-6ag      | 1344               | 3496  | 6768  | 10848 | 25280  | 66048  | 66048  |
| smacv2_10_units | 7168               | 11056 | 25376 | 47088 | 94720  | 148608 | 261888 |
| smacv2_20_units | 4848               | 9144  | 17584 | 34688 | 55232  | 102144 | 228608 |
| small-4ag       | 1472               | 3896  | 7072  | 16448 | 27840  | 61056  | 84224  |
| small-4ag-hard  | 1812               | 3704  | 7072  | 16448 | 26880  | 59776  | 84224  |
| tiny-2ag-hard   | 2824               | 6168  | 10432 | 20192 | 45504  | 77952  | 165632 |
| tiny-4ag-hard   | 1600               | 2672  | 5888  | 9184  | 16960  | 33152  | 58880  |
| xlarge-4ag      | 1832               | 3624  | 7888  | 13248 | 27584  | 50944  | 81152  |
| xlarge-4ag-hard | 1164               | 2280  | 4480  | 8064  | 15296  | 33152  | 58880  |

Table 10: Number of attempts (solutions generated) when using COMPASS with SABLE, IPPO and MAPPO during 30 seconds of inference-time search.

| Task Name       | Number of attempts - Sable |      |      |      |       |       |       | PPO   |
|-----------------|----------------------------|------|------|------|-------|-------|-------|-------|
|                 | 4                          | 8    | 16   | 32   | 64    | 128   | 256   | 64    |
| con-10x10x10a   | 996                        | 1872 | 3744 | 6720 | 13120 | 24832 | 42240 | 65152 |
| con-15x15x23a   | 160                        | 384  | 768  | 1408 | 2752  | 5376  | 8192  | 36608 |
| large-4ag       | 260                        | 464  | 928  | 1664 | 3072  | 4480  | 5888  | 5056  |
| large-4ag-hard  | 256                        | 464  | 928  | 1664 | 2944  | 4480  | 6144  | 4928  |
| large-8ag       | 160                        | 312  | 624  | 1024 | 1728  | 2304  | 3072  | 3520  |
| large-8ag-hard  | 168                        | 304  | 608  | 1056 | 1856  | 2944  | 4096  | 3584  |
| medium-4ag      | 208                        | 392  | 784  | 1504 | 2944  | 4864  | 8704  | 5120  |
| medium-4ag-hard | 208                        | 392  | 784  | 1696 | 2944  | 4864  | 8704  | 5056  |
| medium-6ag      | 152                        | 288  | 576  | 1088 | 2112  | 3840  | 7424  | 4416  |
| smacv2_10_units | 760                        | 1304 | 2608 | 4480 | 7424  | 12288 | 17408 | 30464 |
| smacv2_20_units | 584                        | 928  | 1856 | 3392 | 6400  | 11136 | 18176 | 26880 |
| small-4ag       | 196                        | 432  | 864  | 1408 | 2816  | 6144  | 8320  | 5248  |
| small-4ag-hard  | 188                        | 352  | 704  | 1536 | 3072  | 5120  | 9216  | 5248  |
| tiny-2ag-hard   | 272                        | 592  | 1184 | 2240 | 4480  | 7680  | 14592 | 6848  |
| tiny-4ag-hard   | 136                        | 248  | 496  | 1056 | 1664  | 3200  | 4608  | 5312  |
| xlarge-4ag      | 180                        | 392  | 784  | 1536 | 2432  | 4480  | 8192  | 4160  |
| xlarge-4ag-hard | 116                        | 264  | 528  | 960  | 1792  | 2816  | 5120  | 4288  |

Table 11: Number of attempts (solutions generated) when using stochastic sampling with SABLE, IPPO and MAPPO during 30 seconds of inference-time search.

| Task Name       | Number of attempts - Sable |      |      |      |       |       |       | PPO    |
|-----------------|----------------------------|------|------|------|-------|-------|-------|--------|
|                 | 4                          | 8    | 16   | 32   | 64    | 128   | 256   | 64     |
| con-10x10x10a   | 1060                       | 2048 | 3940 | 7040 | 13760 | 26240 | 44800 | 103680 |
| con-15x15x23a   | 204                        | 400  | 780  | 1408 | 2752  | 5376  | 10112 | 51456  |
| large-4ag       | 208                        | 360  | 768  | 1536 | 3008  | 4608  | 8192  | 5312   |
| large-4ag-hard  | 208                        | 368  | 800  | 1312 | 2688  | 4608  | 8192  | 5184   |
| large-8ag       | 148                        | 248  | 576  | 928  | 1792  | 3072  | 5120  | 3904   |
| large-8ag-hard  | 132                        | 224  | 432  | 832  | 1664  | 3328  | 3200  | 3712   |
| medium-4ag      | 236                        | 456  | 800  | 1504 | 2944  | 5248  | 8128  | 5120   |
| medium-4ag-hard | 212                        | 456  | 784  | 1696 | 2944  | 5248  | 8832  | 5312   |
| medium-6ag      | 132                        | 344  | 672  | 1056 | 2496  | 6528  | 6528  | 4480   |
| smacv2_10_units | 716                        | 1104 | 2528 | 4704 | 9408  | 14848 | 26112 | 33408  |
| smacv2_20_units | 484                        | 912  | 1744 | 3456 | 5504  | 10176 | 22784 | 31808  |
| small-4ag       | 144                        | 384  | 704  | 1632 | 2752  | 6016  | 8384  | 5184   |
| small-4ag-hard  | 180                        | 368  | 704  | 1632 | 2688  | 5888  | 8384  | 5248   |
| tiny-2ag-hard   | 280                        | 608  | 1040 | 2016 | 4544  | 7808  | 16512 | 4544   |
| tiny-4ag-hard   | 160                        | 264  | 576  | 896  | 1664  | 3328  | 5888  | 5312   |
| xlarge-4ag      | 180                        | 360  | 784  | 1312 | 2752  | 5120  | 8128  | 4416   |
| xlarge-4ag-hard | 116                        | 224  | 448  | 800  | 1536  | 3328  | 5888  | 4352   |

Table 12: Number of attempts (solutions generated) when using online fine-tuning with SABLE, IPPO and MAPPO during 30 seconds of inference-time search.

| Task Name       | Number of attempts - Sable |      |      |      |       |       |       | PPO   |
|-----------------|----------------------------|------|------|------|-------|-------|-------|-------|
|                 | 4                          | 8    | 16   | 32   | 64    | 128   | 256   | 64    |
| con-10x10x10a   | 1060                       | 2024 | 3760 | 6432 | 11520 | 22656 | 39424 | 23680 |
| con-15x15x23a   | 212                        | 392  | 672  | 1024 | 1600  | 3200  | 5888  | 5888  |
| large-4ag       | 176                        | 328  | 656  | 992  | 1280  | 2432  | 4864  | 3136  |
| large-4ag-hard  | 204                        | 336  | 640  | 864  | 1280  | 2432  | 4608  | 2944  |
| large-8ag       | 140                        | 232  | 448  | 736  | 1088  | 1920  | 3328  | 2304  |
| large-8ag-hard  | 112                        | 256  | 400  | 672  | 1216  | 2560  | 4352  | 2112  |
| medium-4ag      | 200                        | 416  | 736  | 992  | 1536  | 2816  | 4608  | 2880  |
| medium-4ag-hard | 200                        | 376  | 720  | 1056 | 1472  | 2816  | 4608  | 2880  |
| medium-6ag      | 168                        | 280  | 640  | 864  | 2112  | 3200  | 6400  | 4160  |
| smacv2_10_units | 684                        | 1256 | 2016 | 3744 | 6784  | 15616 | 23552 | 8960  |
| smacv2_20_units | 568                        | 1056 | 1808 | 2496 | 4736  | 10368 | 15360 | 7936  |
| small-4ag       | 192                        | 368  | 704  | 960  | 1408  | 2944  | 4864  | 2816  |
| small-4ag-hard  | 192                        | 368  | 704  | 960  | 1408  | 2944  | 4864  | 2816  |
| tiny-2ag-hard   | 256                        | 560  | 976  | 1312 | 2240  | 4864  | 8448  | 3904  |
| tiny-4ag-hard   | 256                        | 552  | 976  | 1312 | 2240  | 4864  | 8448  | 3904  |
| xlarge-4ag      | 176                        | 384  | 624  | 960  | 1344  | 2432  | 4608  | 2944  |
| xlarge-4ag-hard | 128                        | 200  | 368  | 608  | 1088  | 2048  | 3840  | 2432  |
